# Supplementary material for: Identification of Transformation Products for Benzotriazole, Triclosan, and Trimethoprim by Aerobic and Anoxic-Activated Sludge
Source: Atypon-hosted journal article supplement (doi:10.1061/(asce)ee.1943-7870.0001691), 2020-06-18
Supplement: supplemental_data_ee.1943-7870.0001691_trenholm.pdf [file supplemental_data_ee.1943-7870.0001691_trenholm.pdf]

## SUPPLEMENTAL DATA

*ASCE Journal of Environmental Engineering*

# Identification of Transformation Products for Benzotriazole, Triclosan, and Trimethoprim by Aerobic and Anoxic-Activated Sludge

Rebecca A. Trenholm, Brett J. Vanderford, Narasimman  
Lakshminarasimman, Drew C. McAvoy, and Eric R. V. Dickenson

**DOI:** 10.1061/(ASCE)EE.1943-7870.0001691

© ASCE 2020

[www.ascelibrary.org](http://www.ascelibrary.org)

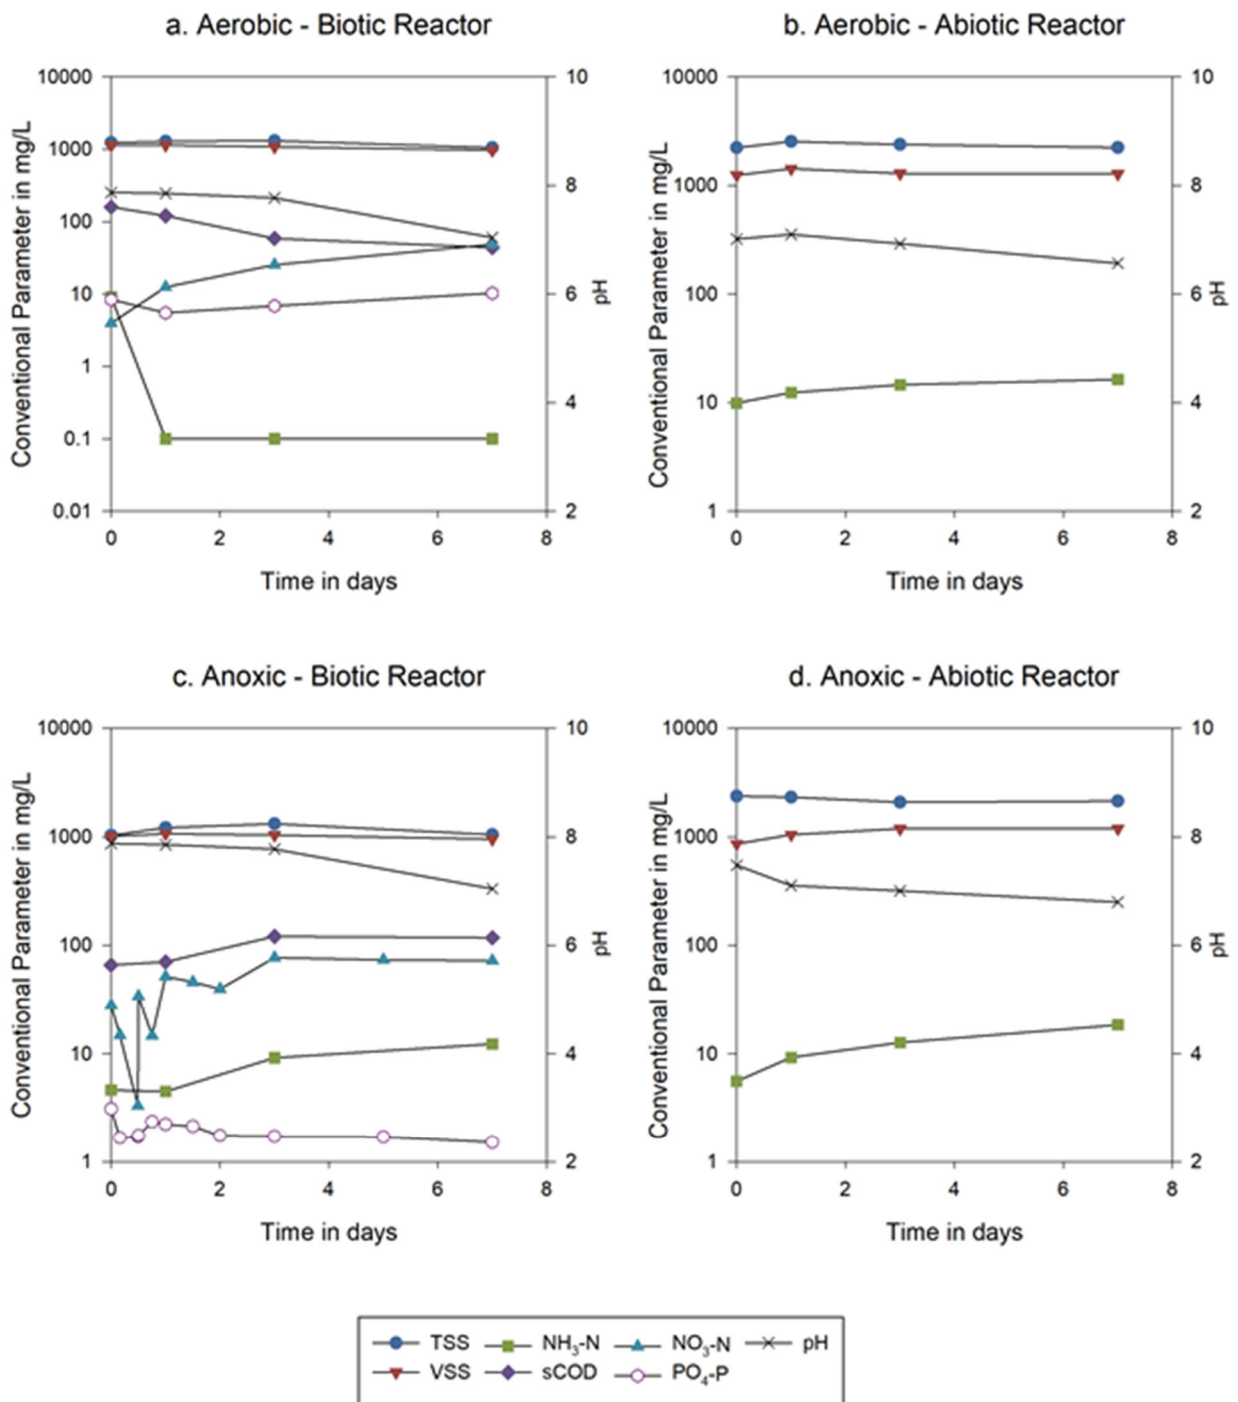

**Fig. S1.** Results from conventional parameters analysis in samples from biotic and abiotic reactors containing BNR activated sludge from aerobic and anoxic redox conditions.

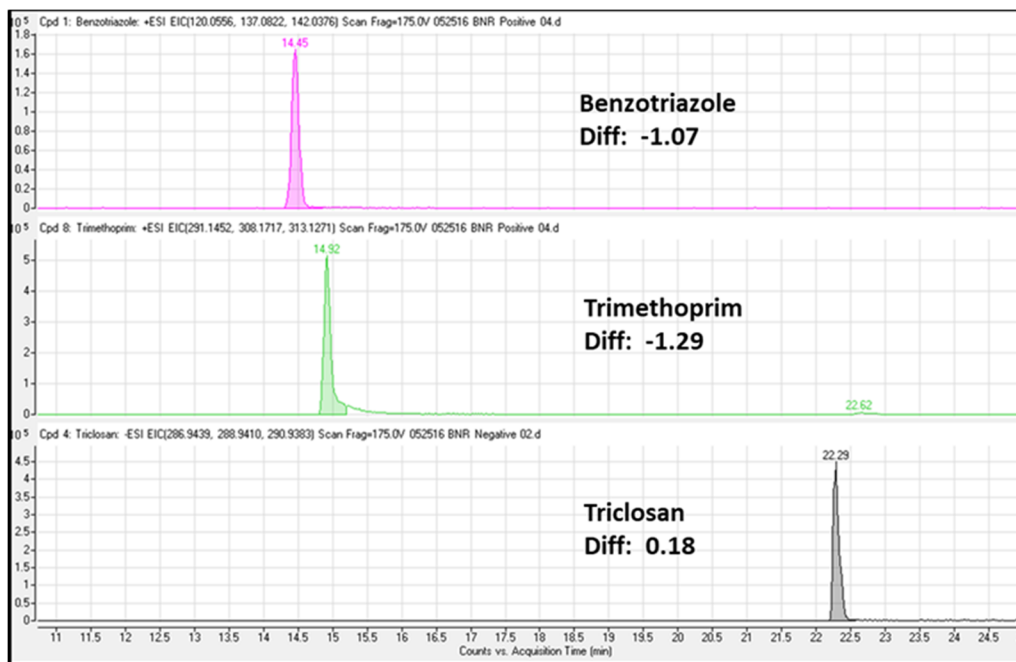

**Fig. S2.** Example chromatogram of parent compounds and Q-TOF results (includes the mass difference between the exact mass (calculated) and observed mass (accurate mass) of each standard)

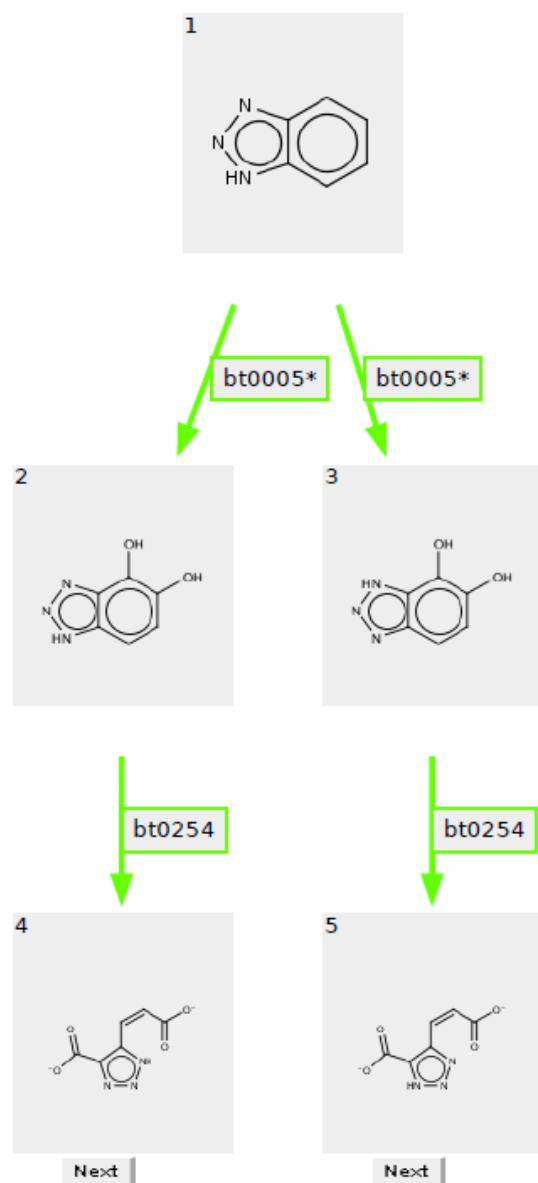

Pathway prediction results from EAWAG-PPS, <http://umbbd.ethz.ch/predict/> (JobID 2016.07.28-04.52.35-21)

**Fig. S3.** EAWAG-PPS pathway for benzotriazole.

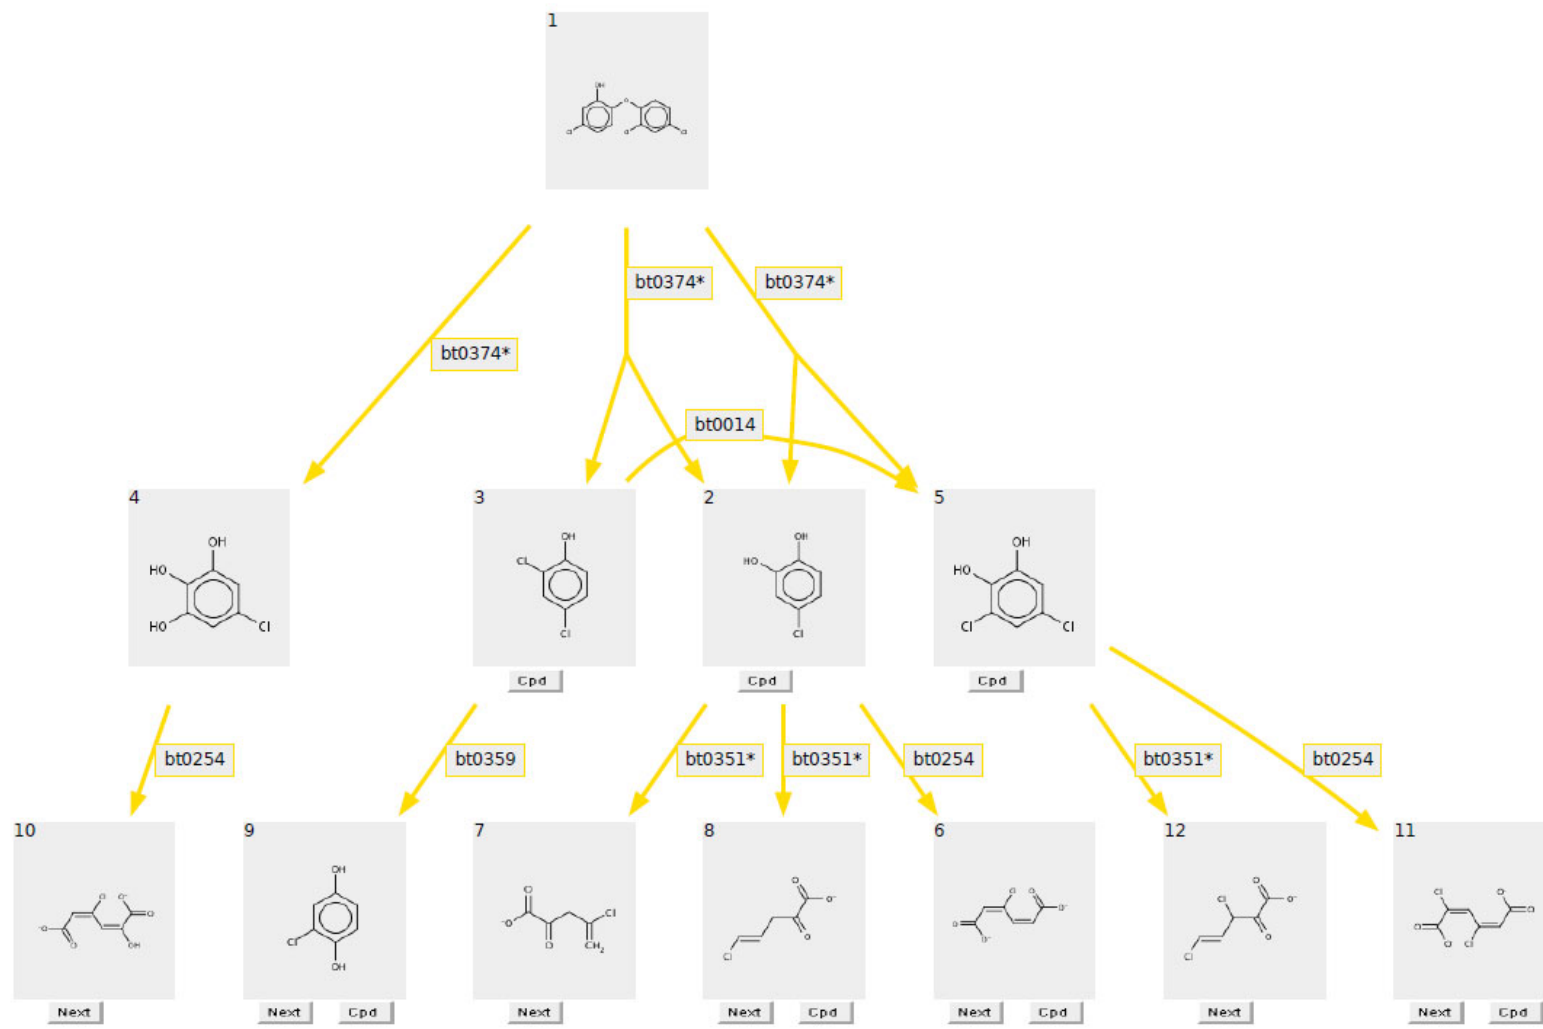

Pathway prediction results from EAWAG-PPS, <http://umbbd.ethz.ch/predict/> (JobID 2016.07.28-03.24.42-31)

**Fig. S4.** EAWAG-PPS pathway for triclosan.

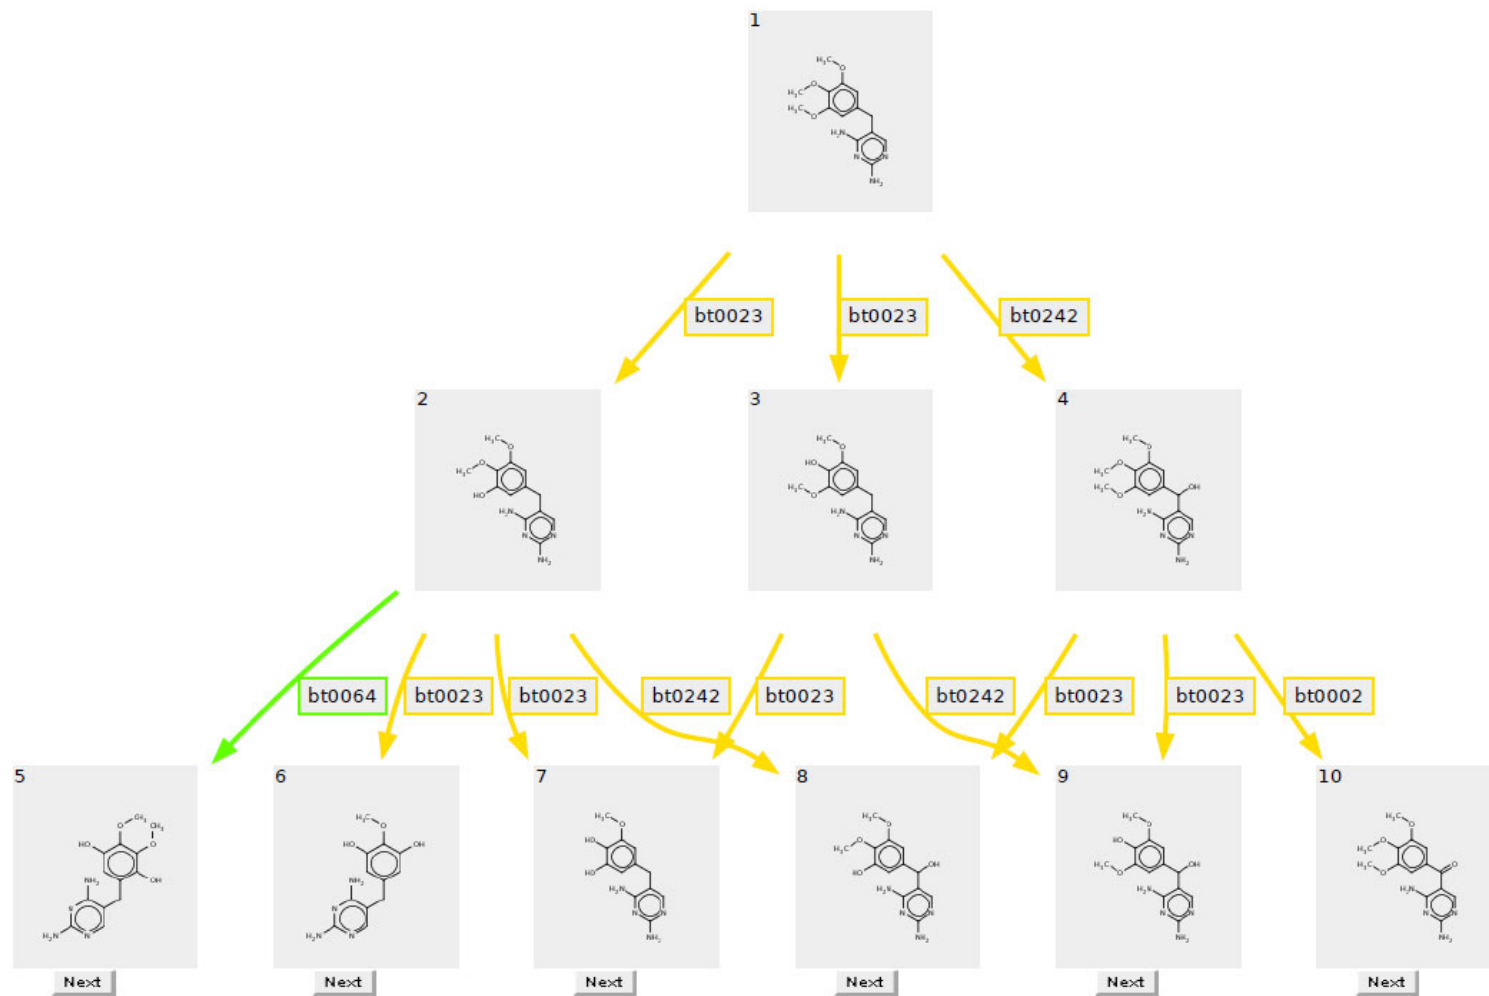

Pathway prediction results from EAWAG-PPS, <http://umbbd.ethz.ch/predict/> (JobID 2016.07.28-04.22.54-56)

**Fig. S5.** EAWAG-PPS pathway for trimethoprim.

| Compound               | Molecular Formula                              | Molecular Weight | IUPAC Name                          | Structure                                                                             |
|------------------------|------------------------------------------------|------------------|-------------------------------------|---------------------------------------------------------------------------------------|
| Benzotriazole          | C <sub>6</sub> H <sub>5</sub> N <sub>3</sub>   | 119.04835        | 1H-benzo[d][1,2,3]triazole          | 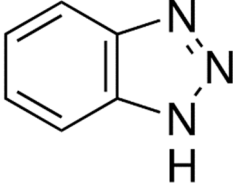   |
| Phenol                 | C <sub>6</sub> H <sub>6</sub> O                | 94.04186         | Phenol                              |    |
| 1-methylbenzotriazole  | C <sub>7</sub> H <sub>7</sub> N <sub>3</sub>   | 133.064          | 1-methyl-1H-benzo[d][1,2,3]triazole |   |
| 4-hydroxybenzotriazole | C <sub>6</sub> H <sub>5</sub> N <sub>3</sub> O | 135.04326        | 1H-benzo[d][1,2,3]triazol-4-ol      |  |

| Compound               | Molecular Formula                              | Molecular Weight | IUPAC Name                           | Structure                                                                             |
|------------------------|------------------------------------------------|------------------|--------------------------------------|---------------------------------------------------------------------------------------|
| 5-hydroxybenzotriazole | C <sub>6</sub> H <sub>5</sub> N <sub>3</sub> O | 135.04326        | 1H-benzo[d][1,2,3]triazol-5-ol       | 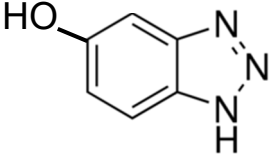   |
| dimethylbenzylamine    | C <sub>9</sub> H <sub>13</sub> N               | 135.1048         | N,N-dimethyl-1-phenylmethanamine     |    |
| 4-methoxybenzotriazole | C <sub>7</sub> H <sub>7</sub> N <sub>3</sub> O | 149.05891        | 4-methoxy-1H-benzo[d][1,2,3]triazole |   |
| 5-methoxybenzotriazole | C <sub>7</sub> H <sub>7</sub> N <sub>3</sub> O | 149.05891        | 5-methoxy-1H-benzo[d][1,2,3]triazole |  |



| Compound         | Molecular Formula | Molecular Weight | IUPAC Name                                                 | Structure                                                                             |
|------------------|-------------------|------------------|------------------------------------------------------------|---------------------------------------------------------------------------------------|
| benzotriazole -2 | $C_6H_5N_3O_2$    | 151.03818        | 1H-benzo[d][1,2,3]triazole-4,5-diol                        | 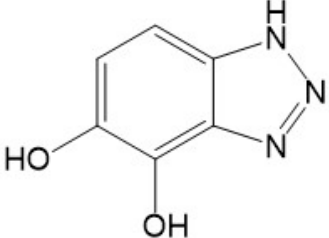   |
| benzotriazole -3 | $C_6H_5N_3O_2$    | 151.03818        | 1H-benzo[d][1,2,3]triazole-6,7-diol                        |    |
| phthalic acid    | $C_8H_6O_4$       | 166.02661        | phthalic acid                                              |   |
| benzotriazole -4 | $C_6H_3N_3O_4$    | 181.01236        | (Z)-5-(2-carboxyvinyl)-1H-1,2,3-triazole-4-carboxylic acid |  |

| Compound                                       | Molecular Formula                                             | Molecular Weight | IUPAC Name                                                      | Structure                                                                             |
|------------------------------------------------|---------------------------------------------------------------|------------------|-----------------------------------------------------------------|---------------------------------------------------------------------------------------|
| benzotriazole -5                               | C <sub>6</sub> H <sub>3</sub> N <sub>3</sub> O <sub>4</sub>   | 181.01236        | (Z)-4-(2-carboxyvinyl)-1H-1,2,3-triazole-5-carboxylic acid      | 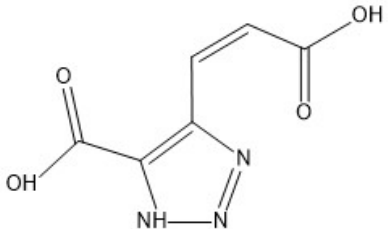   |
| Trimethoprim                                   | C <sub>14</sub> H <sub>18</sub> N <sub>4</sub> O <sub>3</sub> | 290.13789        | 5-(3,4,5-trimethoxybenzyl)pyrimidine-2,4-diamine                |    |
| 2,4-diaminopyrimidine-5-carboxylic acid (DAPC) | C <sub>5</sub> H <sub>6</sub> N <sub>4</sub> O <sub>2</sub>   | 154.04908        | 2,4-diaminopyrimidine-5-carboxylic acid                         |   |
| trimethoprim -6                                | C <sub>12</sub> H <sub>14</sub> N <sub>4</sub> O <sub>3</sub> | 262.10659        | 5-((2,4-diaminopyrimidin-5-yl)methyl)-2-methoxybenzene-1,3-diol |  |

| Compound                 | Molecular Formula                                             | Molecular Weight | IUPAC Name                                                          | Structure                                                                             |
|--------------------------|---------------------------------------------------------------|------------------|---------------------------------------------------------------------|---------------------------------------------------------------------------------------|
| trimethoprim -7          | C <sub>12</sub> H <sub>14</sub> N <sub>4</sub> O <sub>3</sub> | 262.10659        | 5-((2,4-diaminopyrimidin-5-yl)methyl)-3-methoxybenzene-1,2-diol     | 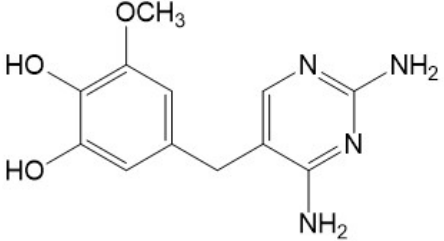   |
| 3-desmethyl-trimethoprim | C <sub>13</sub> H <sub>16</sub> N <sub>4</sub> O <sub>3</sub> | 276.12224        | 5-((2,4-diaminopyrimidin-5-yl)methyl)-2,3-dimethoxyphenol           |    |
| 4-desmethyl-trimethoprim | C <sub>13</sub> H <sub>16</sub> N <sub>4</sub> O <sub>3</sub> | 276.12224        | 4-((2,4-diaminopyrimidin-5-yl)methyl)-2,6-dimethoxyphenol           |   |
| TMP 290                  | C <sub>13</sub> H <sub>14</sub> N <sub>4</sub> O <sub>4</sub> | 290.1015         | (2,4-diaminopyrimidin-5-yl)(4-hydroxy-3,5-dimethoxyphenyl)methanone |  |

| Compound         | Molecular Formula                                             | Molecular Weight | IUPAC Name                                                          | Structure |
|------------------|---------------------------------------------------------------|------------------|---------------------------------------------------------------------|-----------|
| TMP 292          | C <sub>13</sub> H <sub>16</sub> N <sub>4</sub> O <sub>4</sub> | 292.11716        | 4-((2,4-diaminopyrimidin-5-yl)(hydroxy)methyl)-2,6-dimethoxyphenol  |           |
| trimethoprim -5  | C <sub>13</sub> H <sub>16</sub> N <sub>4</sub> O <sub>4</sub> | 292.11716        | 5-((2,4-diaminopyrimidin-5-yl)methyl)-2,3-dimethoxybenzene-1,4-diol |           |
| trimethoprim -8  | C <sub>13</sub> H <sub>16</sub> N <sub>4</sub> O <sub>4</sub> | 292.11716        | 5-((2,4-diaminopyrimidin-5-yl)(hydroxy)methyl)-2,3-dimethoxyphenol  |           |
| trimethoprim -10 | C <sub>14</sub> H <sub>16</sub> N <sub>4</sub> O <sub>4</sub> | 304.11716        | (2,4-diaminopyrimidin-5-yl)(3,4,5-trimethoxyphenyl)methanone        |           |

| Compound         | Molecular Formula    | Molecular Weight | IUPAC Name                                                                      | Structure |
|------------------|----------------------|------------------|---------------------------------------------------------------------------------|-----------|
| TMP 306          | $C_{14}H_{18}N_4O_4$ | 306.13281        | (2,4-diaminopyrimidin-5-yl)(3,4,5-trimethoxyphenyl)methanol                     |           |
| TMP 324          | $C_{14}H_{20}N_4O_5$ | 324.14337        | 2,6-diamino-5-hydroxy-5-(3,4,5-trimethoxybenzyl)-5,6-dihydropyrimidin-4(1H)-one |           |
| triclosan        | $C_{12}H_7Cl_3O_2$   | 287.95116        | 5-chloro-2-(2,4-dichlorophenoxy)phenol                                          |           |
| 4-chlorocatechol | $C_6H_5ClO_2$        | 143.99781        | 4-chlorobenzene-1,2-diol                                                        |           |

| Compound     | Molecular Formula                              | Molecular Weight | IUPAC Name                          | Structure                                                                             |
|--------------|------------------------------------------------|------------------|-------------------------------------|---------------------------------------------------------------------------------------|
| triclosan -9 | C <sub>6</sub> H <sub>5</sub> ClO <sub>2</sub> | 143.99781        | 2-chlorobenzene-1,4-diol            | 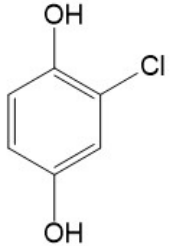   |
| triclosan -7 | C <sub>5</sub> H <sub>4</sub> ClO <sub>3</sub> | 146.9849         | 4-chloro-2-oxopent-4-enoic acid     |    |
| triclosan -8 | C <sub>5</sub> H <sub>4</sub> ClO <sub>3</sub> | 146.9849         | (E)-5-chloro-2-oxopent-4-enoic acid |   |
| triclosan -4 | C <sub>6</sub> H <sub>5</sub> ClO <sub>3</sub> | 159.99272        | 5-chlorobenzene-1,2,3-triol         |  |

| Compound           | Molecular Formula | Molecular Weight | IUPAC Name                               | Structure                                                                             |
|--------------------|-------------------|------------------|------------------------------------------|---------------------------------------------------------------------------------------|
| 2,4-dichlorophenol | $C_6H_4Cl_2O$     | 161.96392        | 2,4-dichlorophenol                       | 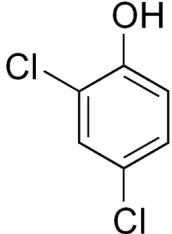   |
| triclosan -6       | $C_6H_3ClO_4$     | 173.97199        | (2E,4Z)-3-chlorohexa-2,4-dienedioic acid |    |
| triclosan -5       | $C_6H_4Cl_2O_2$   | 177.95883        | 3,5-dichlorobenzene-1,2-diol             |   |
| triclosan -12      | $C_5H_3Cl_2O_3$   | 180.94592        | (E)-3,5-dichloro-2-oxopent-4-enoic acid  |  |

| Compound                                | Molecular Formula  | Molecular Weight | IUPAC Name                                         | Structure |
|-----------------------------------------|--------------------|------------------|----------------------------------------------------|-----------|
| triclosan -10                           | $C_6H_3ClO_5$      | 189.9669         | (2E,4E)-4-chloro-2-hydroxyhexa-2,4-dienedioic acid |           |
| triclosan -11                           | $C_6H_2Cl_2O_4$    | 207.93301        | (2E,4E)-2,4-dichlorohexa-2,4-dienedioic acid       |           |
| 3,5-dichloro-2-hydroxybenzene sulfonate | $C_6H_4Cl_2O_4S$   | 241.92073        | 3,5-dichloro-2-hydroxybenzenesulfonic acid         |           |
| methyl-triclosan                        | $C_{13}H_9Cl_3O_2$ | 301.96681        | 2,4-dichloro-1-(4-chloro-2-methoxyphenoxy)benzene  |           |



| Compound             | Molecular Formula   | Molecular Weight | IUPAC Name                                              | Structure                                                                            |
|----------------------|---------------------|------------------|---------------------------------------------------------|--------------------------------------------------------------------------------------|
| monohydroxytriclosan | $C_{12}H_7Cl_3O_3$  | 303.94608        |                                                         | 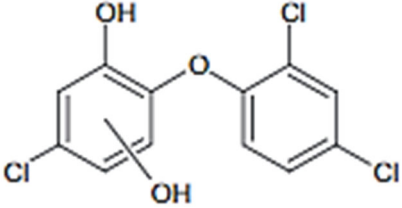  |
| dihydroxytriclosan   | $C_{12}H_7Cl_3O_4$  | 319.94099        |                                                         |   |
| triclosan-o-sulfate  | $C_{12}H_7Cl_3O_5S$ | 367.90798        | 5-chloro-2-(2,4-dichlorophenoxy)phenyl hydrogen sulfate |  |

**Figure S6.** Full list of possible transformation product intermediates for three parent compounds (in bold) used in the qualitative screening personal compounds database and their molecular formula, molecular weight, IUPAC name where no common name is given, and corresponding structure.

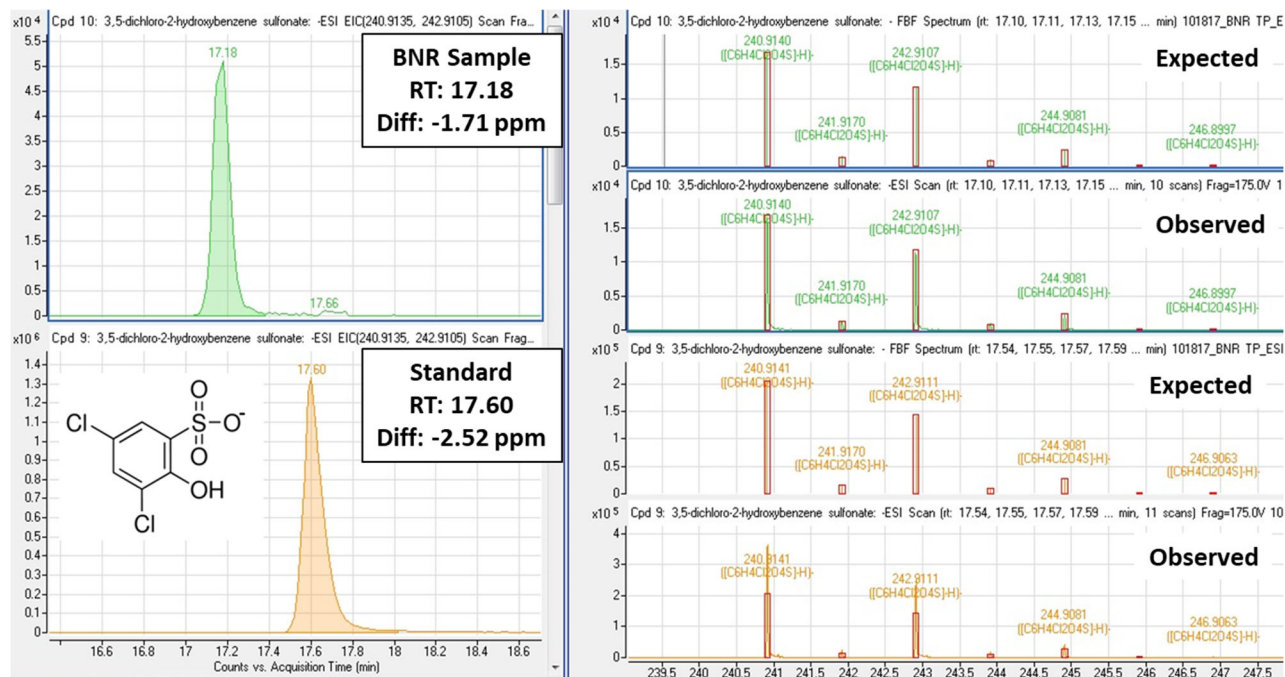

**Fig. S7.** Comparison of retention times for 3,5-dichloro-2-hydroxybenzene sulfonate standard to potential transformation product observed in sample, including expected and observed mass spectrum for each peak and mass error

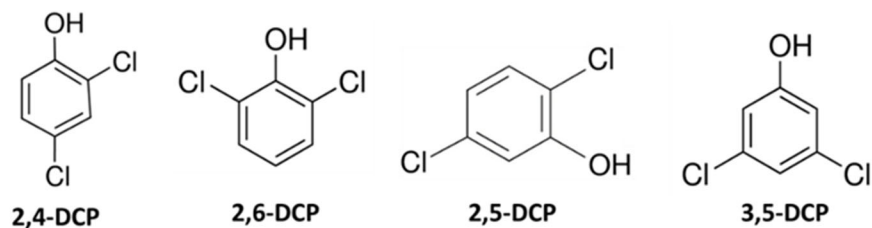

**Fig. S8.** Dichlorophenol (DCP) isomers tested
